# Supplementary material for: Дискогенная пояснично-крестцовая радикулопатия
Source: Royal Society of Chemistry journal article supplement (doi:10.1039/d0ra07840a), 2010-01-01
Supplement: d0ra07840a1.pdf [file d0ra07840a1.pdf]

## Supplementary Information

### **Co-digestion of microalgae with potato processing waste and glycerol: effect of glycerol addition on methane production and the microbial community**

Yanghanzi Zhang<sup>a</sup>\*, Gary S. Caldwell<sup>b</sup>, Philip T. Blythe<sup>a</sup>,  
Andrew M. Zealand<sup>c</sup>, Shuo Li<sup>a</sup>, Simon Edwards<sup>a</sup>, Jin Xing<sup>a</sup>, Paul Goodman<sup>a</sup>, Paul  
Whitworth<sup>b</sup>, Paul J. Sallis<sup>a</sup>

<sup>a</sup> School of Engineering, Newcastle University, Cassie Building, Claremont Road, Newcastle upon Tyne, NE1 7RU, UK

<sup>b</sup> School of Natural and Environmental Sciences, Newcastle University, Ridley Building, Claremont Road, Newcastle upon Tyne, NE1 7RU, UK

<sup>c</sup> Department of Applied Sciences, Faculty of Health and Life Sciences, Northumbria University, Newcastle Upon Tyne NE1 8ST, UK

\*corresponding author: [yanghanzi.zhang@newcastle.ac.uk](mailto:yanghanzi.zhang@newcastle.ac.uk)

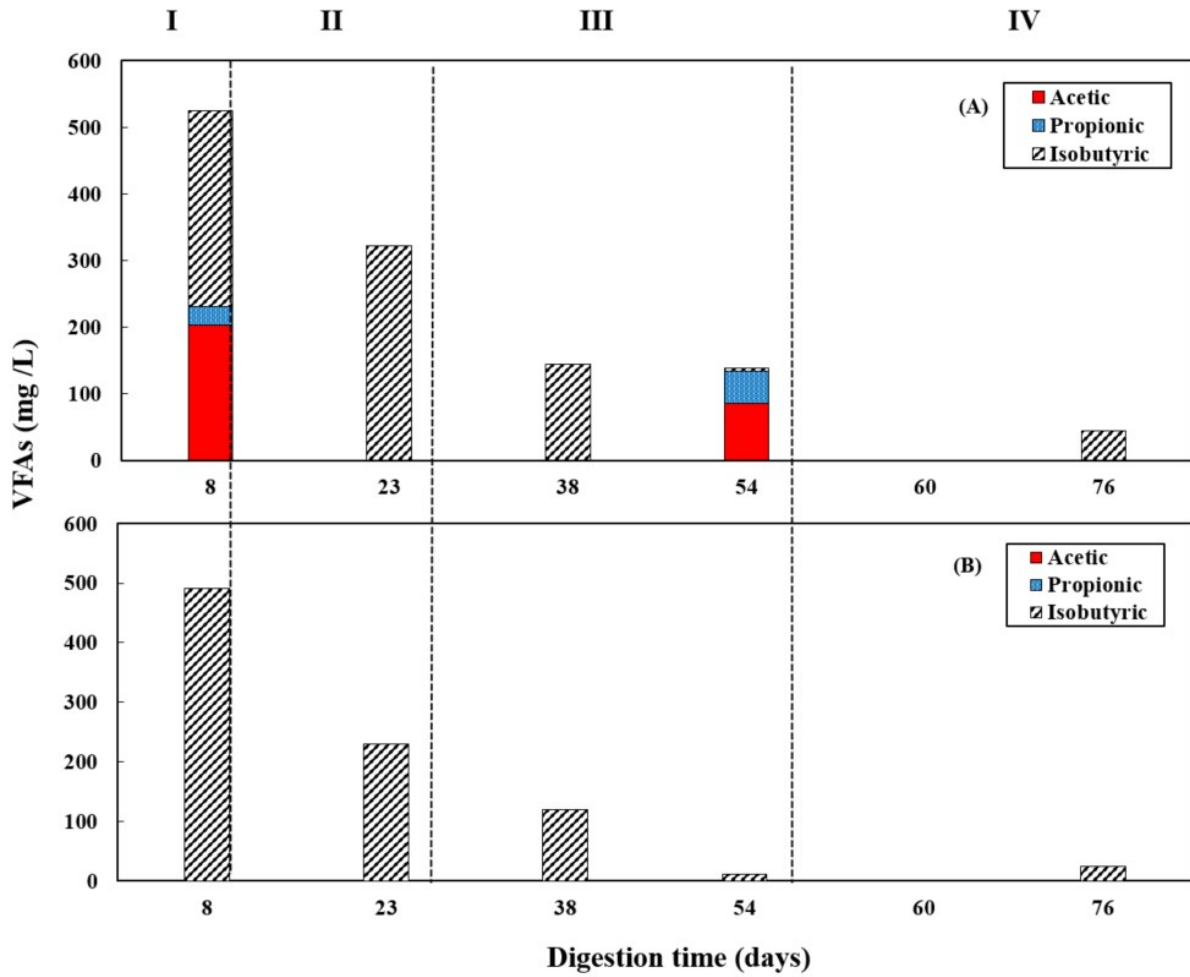

**Figure S1.** Concentrations of acetic, propionic and isobutyric acids in semi-continuous anaerobic co-digestion of *C. vulgaris* and potato discarded parts (PPW<sub>dp</sub>) (A) with glycerol (C1) and (B) without glycerol (C2). Note: acetic and propionic acids below detection in all digester C2, and some C1 periods.

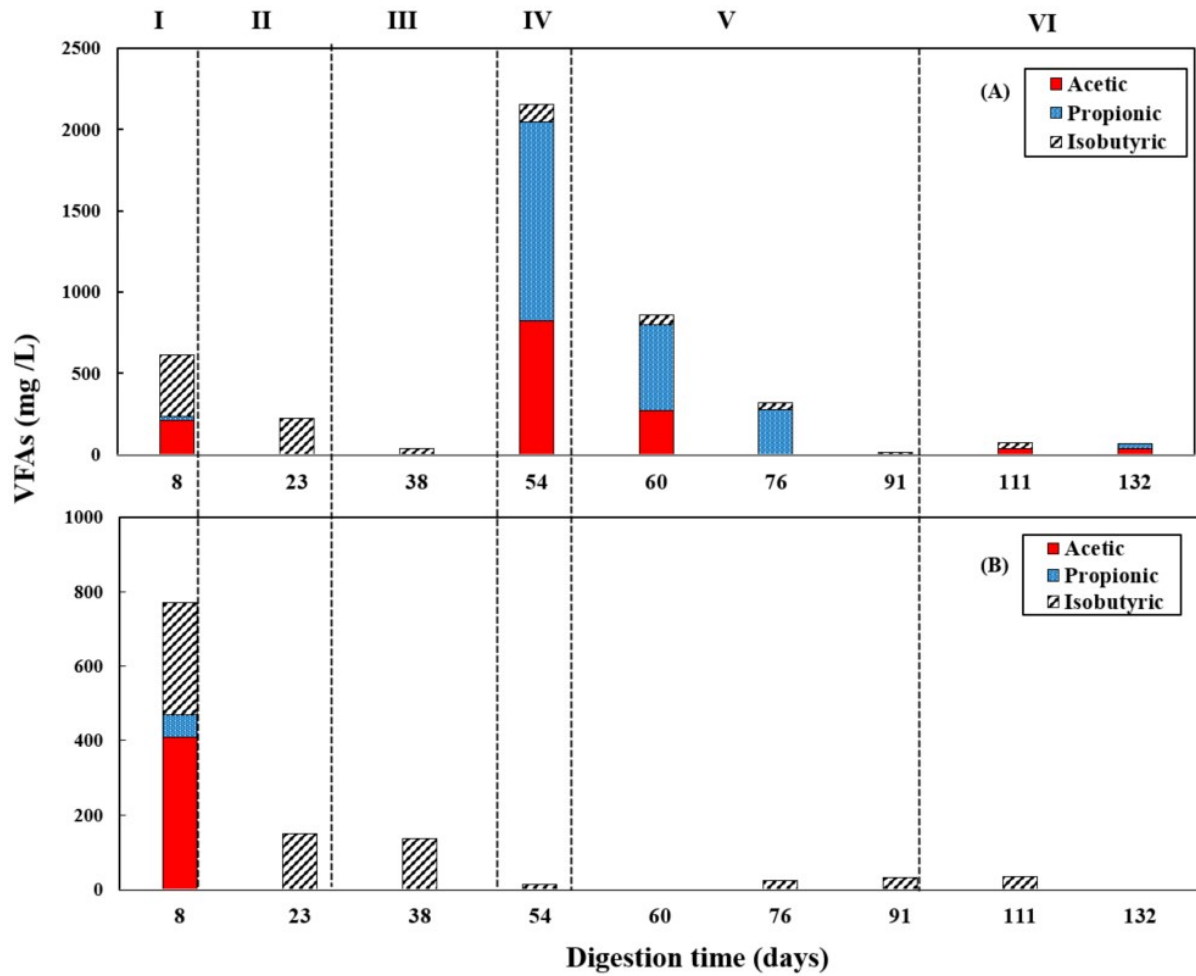

**Figure S2.** Concentrations of acetic, propionic and isobutyric acids in semi-continuous anaerobic co-digestion of *C. vulgaris* and potato peel (PPW<sub>p</sub>) (A) with glycerol, digester C3 and (B) without glycerol, digester C4. Note: acetic and propionic acids below detection in some periods of digesters C3 and C4.

**Table S1.** Performance of digesters co-digesting *C. vulgaris* and PPW<sub>dp</sub> with or without glycerol during different experimental stages.

|                                                            | Digester C1               |                          | Digester C2               |                          |
|------------------------------------------------------------|---------------------------|--------------------------|---------------------------|--------------------------|
|                                                            | Period III<br>(day 24-56) | Period IV<br>(day 57-76) | Period III<br>(day 24-56) | Period IV<br>(day 57-76) |
| <b>OLR (g COD/L/d)</b>                                     | 1.20                      | 0.70                     | 0.60                      | 0.60                     |
| <b>Process stability</b>                                   |                           |                          |                           |                          |
| pH                                                         | 6.94 ± 0.01 <sup>a</sup>  | 6.75 ± 0.01              | 7.05 ± 0.01               | 6.81 ± 0.06              |
| Total Alkalinity (g/L)                                     | 2.06 ± 0.02               | 1.45 ± 0.25              | 2.80 ± 0.04               | 1.86 ± 0.02              |
| Total VFAs (g/L)                                           | 0.93 ± 0.11               | 0.56 ± 0.06              | 0.31 ± 0.06               | 0.35 ± 0.01              |
| NH <sup>+</sup> <sub>4</sub> -N (g/L)                      | 0.34 ± 0.01               | 0.32 ± 0.01              | 0.53 ± 0.02               | 0.35 ± 0.04              |
| FAN (mg/L)                                                 | 3.86 ± 0.21               | 2.35 ± 0.21              | 7.56 ± 0.60               | 2.86 ± 0.73              |
| <b>Digester effluent</b>                                   |                           |                          |                           |                          |
| TS (g/L)                                                   | 8.09 ± 0.19               | 5.67 ± 0.01              | 6.79 ± 0.35               | 4.70 ± 0.39              |
| VS (g/L)                                                   | 5.36 ± 0.05               | 3.81 ± 0.01              | 4.18 ± 0.32               | 2.77 ± 0.37              |
| COD <sub>t</sub> (g/L)                                     | 6.86 ± 0.06               | 6.04 ± 0.06              | 5.84 ± 0.01               | 4.43 ± 0.08              |
| COD <sub>s</sub> (g/L)                                     | 1.49 ± 0.02               | 1.01 ± 0.05              | 1.25 ± 0.04               | 0.72 ± 0.06              |
| VS <sub>removal</sub> (%)                                  | 49 ± 7                    | 64 ± 5                   | 57 ± 1                    | 71 ± 1                   |
| COD <sub>removal</sub> (%)                                 | 59 ± 7                    | 64 ± 6                   | 69 ± 2                    | 77 ± 2                   |
| <b>Methane production</b>                                  |                           |                          |                           |                          |
| Volumetric CH <sub>4</sub> yield (L/L/d)                   | 0.59 ± 0.08               | 0.51 ± 0.05              | 0.19 ± 0.02               | 0.19 ± 0.03              |
| Specific CH <sub>4</sub> yield (L/g COD <sub>added</sub> ) | 0.49 ± 0.07               | 0.73 ± 0.07              | 0.32 ± 0.03               | 0.32 ± 0.05              |

<sup>a</sup> Mean ± SD, n = 2.

**Table S2.** Performance of digesters co-digesting *C. vulgaris* and PPW<sub>p</sub> with or without glycerol during the different experimental stages.

|                                                            | Digester C3               |                           | Digester C4               |                           |
|------------------------------------------------------------|---------------------------|---------------------------|---------------------------|---------------------------|
|                                                            | Period III<br>(day 24-45) | Period VI<br>(day 95-132) | Period III<br>(day 24-45) | Period VI<br>(day 95-132) |
| <b>OLR (g COD/L/d)</b>                                     | 1.12                      | 0.60                      | 0.50                      | 0.50                      |
| <b>Process stability</b>                                   |                           |                           |                           |                           |
| pH                                                         | 7.18 ± 0.01 <sup>a</sup>  | 6.80 ± 0.01               | 7.16 ± 0.01               | 6.65 ± 0.01               |
| Total Alkalinity (g/L)                                     | 3.10 ± 0.14               | 1.10 ± 0.01               | 3.39 ± 0.02               | 1.30 ± 0.01               |
| Total VFAs (g/L)                                           | 0.70 ± 0.02               | 0.18 ± 0.01               | 0.39 ± 0.06               | 0.18 ± 0.01               |
| NH <sub>4</sub> <sup>+</sup> -N (g/L)                      | 0.53 ± 0.01               | 0.16 ± 0.01               | 0.57 ± 0.02               | 0.18 ± 0.04               |
| FAN (mg/L)                                                 | 10.4 ± 0.23               | 1.28 ± 0.03               | 10.5 ± 0.16               | 1.07 ± 0.04               |
| <b>Digester effluent</b>                                   |                           |                           |                           |                           |
| TS (g/L)                                                   | 8.75 ± 0.05               | 4.51 ± 0.01               | 7.22 ± 0.03               | 4.02 ± 0.01               |
| VS (g/L)                                                   | 5.70 ± 0.15               | 3.30 ± 0.01               | 4.34 ± 0.09               | 2.85 ± 0.01               |
| COD <sub>t</sub> (g/L)                                     | 10.7 ± 0.43               | 4.88 ± 0.01               | 7.67 ± 0.42               | 4.10 ± 0.01               |
| COD <sub>s</sub> (g/L)                                     | 3.02 ± 1.91               | 0.88 ± 0.01               | 1.07 ± 0.01               | 0.41 ± 0.02               |
| VS <sub>removal</sub> (%)                                  | 48 ± 6                    | 70 ± 3                    | 56 ± 1                    | 71 ± 1                    |
| COD <sub>removal</sub> (%)                                 | 50 ± 5                    | 77 ± 1                    | 58 ± 5                    | 78 ± 2                    |
| <b>Methane production</b>                                  |                           |                           |                           |                           |
| Volumetric CH <sub>4</sub> yield (L/L/d)                   | 0.60 ± 0.05               | 0.33 ± 0.02               | 0.15 ± 0.02               | 0.17 ± 0.03               |
| Specific CH <sub>4</sub> yield (L/g COD <sub>added</sub> ) | 0.54 ± 0.04               | 0.55 ± 0.03               | 0.31 ± 0.04               | 0.34 ± 0.06               |

<sup>a</sup> Mean ± SD, n = 2.
